# Supplementary material for: First intramolecular trapping and structural proof of the key intermediate in the formation of indolizine photochromics
Source: Royal Society of Chemistry journal article supplement (doi:10.1039/b101044l), 2001-01-01
Supplement: b101044l.doc [file b101044l.doc]

**Fig. S1** X-ray structure of **5b** with key atoms labelled. Atoms are drawn as spheres of arbitrary radius. Selected bond lengths (Å) and angles (deg) include C(1)-C(17) 1.500, C(17)-C(18) 1.565, C(18)-C(1) 1.540, C(18)-C(1)-C(17) 61.96, C(1)-C(17)-C(18) 60.28, C(17)-C(18)-C(1) 57.76.

**Fig. S2** X-ray structure of **4f** with key atoms labelled. Atoms are drawn as spheres of arbitrary radius. Selected bond lengths (Å) and angles (deg) include C(1)-N(1) 1.463, N(1)-C(10) 1.355, C(10)-C(11) 1.344, C(11)-C(12) 1.525, C(12)-C(1) 1.613, C(1)-N(1)-C(10) 111.13, N(1)-C(10)-C(11) 112.54, C(10)-C(11)-C(12) 108.84, C(11)-C(12)-C(1) 115.53, C(12)-C(1)-N(1) 100.73.
